# Supplementary material for: Heterogeneous interface-induced electrocatalytic efficiency boosting of bimetallic Cu/Zn selenides for stable water oxidation and oxygen reduction reactions
Source: Royal Society of Chemistry journal article supplement (doi:10.1039/d2cy00472k), 2022-01-01
Supplement: d2cy00472k1.pdf [file d2cy00472k1.pdf]

# Heterogeneous interface induced electrocatalytic efficiency boosting of bimetallic Cu/Zn selenides for stable water oxidation and oxygen reduction reactions

*Muthuraja Velpandian<sup>a</sup>, Govind Ummethala<sup>b</sup>, Sairam K Malladi<sup>b</sup>, Praveen Meduri<sup>a\*</sup>*

<sup>a</sup> Department of Chemical Engineering, Indian Institute of Technology Hyderabad, Kandi, Sangareddy-502285, Telangana (India)

<sup>b</sup> Department of Materials Science and Metallurgical Engineering, Indian Institute of Technology Hyderabad, Kandi, Sangareddy-502285, Telangana (India)

**Table S1** Fitted values of  $R_s$ ,  $R_{ct}$  and  $C_{dl}$  with the circuit shown in Fig. S7.

| Sample     | $R_s$ , $\Omega$ | $R_{ct}$ , $\Omega$ | $C_{dl}$ , $\mu\text{F}$ |
|------------|------------------|---------------------|--------------------------|
| CZSe@C-450 | 29.04            | 16.3                | 6.59                     |
| CZSe@C-550 | 29.12            | 24.6                | 10.1                     |
| CZSe@C-350 | 29.95            | 27.3                | 16.7                     |
| CuSe@C     | 31               | 28.28               | 17.2                     |
| ZnSe@C     | 30.02            | 28.31               | 19.3                     |

### Determination of electrochemical surface area:

The electrochemical surface area (ECSA) is determined using double layer capacitance. CVs are acquired by varying the scan rate (0.1 V s<sup>-1</sup> to 0.8 V s<sup>-1</sup>; Fig. S8) wherein, current is measured where both anodic and cathodic scans are parallel to one another (non-faradaic potential region) at a particular potential and plotted against the corresponding scan rate which follows the following equation:

$$I_c = \nu C_{dl}$$

where  $I_c$  is the double layer charging current,  $\nu$  is the scan rate and  $C_{dl}$  is the double layer capacitance associated with it, which is the slope of the linear plot between  $I_c$  vs  $\nu$ .

ECSA of an electrocatalyst is then calculated using the following equation:

$$ECSA = \frac{C_{dl}}{C_s}$$

where the specific capacitance  $C_s$  is of the atomically smooth planar surface of the same material under similar experimental conditions. The reported value of  $C_s$  is 0.04 mF cm<sup>-2</sup> in alkaline conditions and is used to calculate ECSA in this study<sup>1</sup>.

**Table S2** Calculated values of ECSA.

| Sample     | ECSA,cm <sup>2</sup> |
|------------|----------------------|
| CZSe@C-450 | 4.70                 |
| CZSe@C-550 | 2.74                 |
| CZSe@C-350 | 2.35                 |
| CuSe@C     | 0.12                 |
| ZnSe@C     | 0.11                 |

**Determination of Turnover frequency (TOF):**

TOF is calculated using the following equation<sup>2</sup>:

$$TOF = \frac{J}{4 F N_s}$$

where  $J$ ,  $F$  and  $N_s$  are current density at a certain overpotential ( $A\ cm^{-2}$ ), Faraday constant ( $96485\ C\ mol^{-1}$ ) and concentration of active sites in the catalyst ( $mol\ cm^{-2}$ ), respectively.

$N_s$  is determined using the following relation<sup>2</sup>:

$$\frac{i_{peak}}{\nu} = \frac{n^2 F^2 A N_s}{4 RT}$$

where  $\frac{i_{peak}}{\nu}$ ,  $n$ ,  $R$ , and  $T$  are the slope of the plot generated between peak current and scan rate using CV's at different scan rates in the potential range of the reaction (Fig. S9), number of electrons transferred, ideal gas constant and absolute temperature, respectively.

**Table S3** Calculated values of  $N_s$  (concentration of active sites) and TOF (turn over frequency).

| Sample     | $N_s$ , $mol\ cm^{-2}$ | TOF, $s^{-1}$ (at current density of $10\ mA\ cm^{-2}$ ) |
|------------|------------------------|----------------------------------------------------------|
| CZSe@C-450 | 1.16E-7                | 0.22                                                     |
| CZSe@C-550 | 1.34E-7                | 0.19                                                     |
| CZSe@C-350 | 3.12E-7                | 0.08                                                     |

**Determination of Faradaic efficiency using rotating ring-disk electrode (RRDE):**

Rotating ring-disk electrode (RRDE) consists of a Pt ring and a GC disc. CZSe@C-450 is drop-casted on to GC and dried under ambient conditions. LSV (Fig. S11) is generated at a scan rate of 2 mV s<sup>-1</sup> at 1600 rpm by sweeping the potential from 1.1 to 1.85 V vs. RHE where O<sub>2</sub> is generated (GC disc) and the generated O<sub>2</sub> is reduced at the Pt ring where a constant potential of -0.5 V is applied to enable an efficient oxygen reduction reaction (ORR). Faradaic efficiency is calculated using the following equation<sup>3</sup>:

$$\text{Faradaic Efficiency} = \frac{I_R n_D}{I_D n_R N_{CL}}$$

where  $I_R$  is the ring current due to the reduction of oxygen,  $I_D$  is the disk current due to the evolution of oxygen,  $n_D$  and  $n_R$  are the numbers of electrons transferred during the evolution and reduction of O<sub>2</sub> (both are 4). The parameter  $N_{CL}$  indicates the collection efficiency of RRDE, which can be determined using a ferrocyanide/ferricyanide redox couple. An average  $N_{CL}$  of 0.3684 is used which is in fair agreement with that of a commercially provided RRDE comprising of a GC disc and a Pt ring (0.37).

### Determination of number of electrons in ORR:

The number of electrons transferred ( $n$ ) is obtained by Koutecky-Levich (K-L) equation as follows<sup>4</sup>:

$$\frac{1}{j} = \frac{1}{B\sqrt{\omega}} + \frac{1}{j_k}$$

$$B = 0.62 n F D^{\frac{2}{3}} \gamma^{\frac{-1}{6}} C$$

where  $j$  is the current density,  $j_k$  is the kinetic current density,  $\omega$  is the electrode rotation rate,  $n$  is the electron transfer number,  $F$  is the Faraday constant ( $F = 96485 \text{ C mol}^{-1}$ ),  $C$  is the concentration of dissolved  $\text{O}_2$  in 0.1M KOH ( $C_0 = 1.2 \times 10^{-6} \text{ mol cm}^{-3}$ ),  $D$  is the diffusion coefficient of  $\text{O}_2$  in 0.1M KOH ( $D = 1.9 \times 10^{-5} \text{ cm}^2 \text{ s}^{-1}$ ),  $\gamma$  is the kinematic viscosity of 0.1M KOH ( $\gamma = 0.01 \text{ cm}^2 \text{ s}^{-1}$ ).

**Table S4** Kinetic parameters of CZSe@C-450 for ORR at different potentials.

| Potential, V | Slope | Intercept | No. of electrons | $j_k$ , $\text{mA cm}^{-2}$ |
|--------------|-------|-----------|------------------|-----------------------------|
| 0.7          | 2.75  | 0.26      | 3.27             | -3.80                       |
| 0.6          | 2.75  | 0.16      | 3.26             | -6.14                       |
| 0.55         | 2.85  | 0.14      | 3.15             | -6.92                       |
| 0.5          | 2.96  | 0.13      | 3.03             | -7.55                       |
| 0.45         | 2.98  | 0.11      | 3.02             | -8.51                       |
| 0.4          | 2.89  | 0.11      | 3.10             | -8.60                       |
| 0.35         | 2.71  | 0.11      | 3.31             | -8.37                       |
| 0.3          | 2.52  | 0.15      | 3.56             | -6.43                       |

RRDE experiment is used to verify the electron transfer number (n) during ORR using the equation below:

$$n = \frac{4 |I_D|}{|I_D| + \frac{I_R}{N}}$$

The hydrogen peroxide production yield is calculated by the equation below:

$$\%H_2O_2 \text{ yield} = \frac{200 * \frac{i_R}{N}}{|i_D| + \frac{i_R}{N}}$$

where  $I_R$  is the ring current,  $I_D$  is the disk current and  $N$  indicates the collection efficiency of RRDE which can be determined using a ferrocyanide/ferricyanide redox couple. An average  $N$  value of 0.3684 is used which is in fair agreement with that of a commercially provided RRDE comprising of a GC disc and a Pt ring (0.37).

#### **Determination of mass activity and specific activity of ORR electrocatalysis:**

The mass activity is calculated using the kinetic current at 0.8 V vs RHE in the ORR polarisation curve normalized by the catalyst loading. The specific activity is calculated using the kinetic current at 0.8 V vs RHE normalized by the Brunauer–Emmett–Teller (BET) surface area.

**Table S5** Comparison of electrochemical performance of copper and zinc based electrocatalysts.

| Electrocatalytic Oxygen Evolution Reaction         |                                        |             |                               |                      |           |
|----------------------------------------------------|----------------------------------------|-------------|-------------------------------|----------------------|-----------|
| Electrocatalyst                                    | Synthesis Method                       | Electrolyte | Over potential (mV vs RHE)    | Tafel Slope (mV/dec) | Reference |
| CZSe@C-450                                         | Electrospinning & selenisation         | 1 M NaOH    | 260                           | 62                   | This work |
| Cu <sub>2</sub> Se                                 | Electrodeposition                      | 1M KOH      | 270                           | 107.6                | 5         |
| Cu <sub>2</sub> Se                                 | Hydrothermal                           | 1M KOH      | 290                           | 136.7                | 5         |
| Cu <sub>2</sub> Se                                 | CVD                                    | 1M KOH      | 300                           | 90.9                 | 5         |
| Cu <sub>2</sub> Se                                 | Electrodeposition                      | 1M KOH      | 320                           | 48.1                 | 5         |
| CuSe/NF                                            | Solid state                            | 1M KOH      | 297                           | 89                   | 6         |
| Cu(OH) <sub>2</sub> NWS/CF                         | Simple chemical reaction and oxidation | 0.1 M NaOH  | 530                           | 86                   | 7         |
| CuO NWS                                            | Simple chemical reaction and oxidation | 0.1 M NaOH  | 590                           | 84                   | 7         |
| CuOx NWS                                           | Simple chemical reaction and oxidation | 0.1 M NaOH  | 630                           | 108                  | 7         |
| Annealed CuO                                       | Electrodeposition                      | 1 M KOH     | 430(1 mA cm <sup>-2</sup> )   | 61.4                 | 8         |
| H <sub>2</sub> O <sub>2</sub> treated CuO          | Hydrothermal                           | 0.1 M KOH   | 520(2.5mA cm <sup>-2</sup> )  | -                    | 9         |
| Cu <sub>0.3</sub> Ir <sub>0.7</sub> O <sub>8</sub> | Hydrothermal                           | 1 M KOH     | 415                           | 105                  | 10        |
| CuCo <sub>2</sub> O <sub>4</sub> -SSM              | Sacrificial support method             | 1 M KOH     | 420                           | -                    | 11        |
| CuRhO <sub>2</sub>                                 | Coprecipitation                        | 0.1 M KOH   | 400                           | 81                   | 12        |
| Cu <sub>3</sub> P/CF                               | Surface oxidation                      | 1 M KOH     | 412 (50mA cm <sup>-2</sup> )  | 63                   | 13        |
| Cu <sub>3</sub> P/ CuO core shell nanorod arrays   | Electrochemical oxidation              | 1M KOH      | 315                           | 74.8                 | 14        |
| Cu <sub>2</sub> S/CF nanosheet                     |                                        | 1M KOH      | 336 (20 mA cm <sup>-2</sup> ) | 101                  | 15        |
| CuO/C nano dendritic                               | Electrodeposition                      | 1 M NaOH    | 290                           | 67.5                 | 16        |
| CuCo <sub>2</sub> S <sub>4</sub> nanosheets        | Hydrothermal                           | 1M KOH      | 310                           | 86                   | 17        |

|                                                   |                                            |                                    |                                           |                            |                  |
|---------------------------------------------------|--------------------------------------------|------------------------------------|-------------------------------------------|----------------------------|------------------|
| CuO nanowire                                      | Electrodeposition                          | 1M Na <sub>2</sub> CO <sub>3</sub> | 580                                       | 86                         | 18               |
| Cu/Cu(OH) <sub>2</sub> -CuO nanorods              | anodisation                                | 0.1 M KOH                          | 417                                       | 76                         | 19               |
| Cu <sub>2</sub> Se core/shell nanotube arrays     | Simple chemical reaction immersion         | 1 M KOH                            | 200                                       | 150                        | 20               |
| Cu <sub>2</sub> Se-Cu <sub>2</sub> O film         | Electrodeposition                          | 0.2M carbonate buffer              | 465                                       | 140                        | 21               |
| Cu <sub>2</sub> S branch arrays                   | Electrodeposition and sulfurization        | 1M KOH                             | 284                                       | 72                         | 22               |
| Ce modified CuO <sub>x</sub>                      | Electrodeposition                          | 0.1 M KOH                          | 400                                       | 74                         | 23               |
| CuO nanowire                                      | Wet chemistry annealing                    | 1M Na <sub>2</sub> CO <sub>3</sub> | 500                                       | 41                         | 24               |
| CuCo <sub>2</sub> Se <sub>4</sub> @ Au            | Hydrothermal                               | 1M KOH                             | 320                                       | 66.5                       | 25               |
| Fe-doped MOF CuCoSe@HCNFs                         | Hydrothermal & sacrificial agent annealing | 1M KOH                             | 260 (20mA cm <sup>-2</sup> )              | 57                         | 26               |
| Cu <sub>2</sub> Se/NiSe <sub>2</sub> /NF          | Hydrothermal                               | 1 M KOH                            | 277 (50mA cm <sup>-2</sup> )              | 40.17                      | 27               |
| ZnSe with reduced titania                         | Solvothermal                               | 0.1 M KOH                          | 570                                       | 45                         | 28               |
| <b>Electrocatalytic Oxygen Reduction Reaction</b> |                                            |                                    |                                           |                            |                  |
| <b>Electrocatalyst</b>                            | <b>Synthesis Method</b>                    | <b>Electrolyte</b>                 | <b>J<sub>L</sub> (mA cm<sup>-2</sup>)</b> | <b>E<sub>1/2</sub> (V)</b> | <b>Reference</b> |
| CZSe@C-450                                        | Electrospinning & selenisation             | 0.1M KOH                           | 3.65                                      | 0.88 V vs RHE              | This work        |
| Cu <sub>2-x</sub> Se                              | Chemical synthesis                         | 0.1M KOH                           | 4                                         | -0.21 V vs Ag/Agcl         | 29               |
| CuSe decorated CNT                                | Hydrothermal                               | 0.1M KOH                           | 2.37                                      | 0.5 V vs Ag/Agcl           | 30               |
| CuSe @ graphene CNT                               | Hydrothermal                               | 0.1M KOH                           | 4.5                                       | -0.12 V vs SCE             | 31               |
| N doped Graphene/ZnSe                             | Hydrothermal                               | 1M KOH                             | 2.4                                       | -1.85 V vs Hg/HgO          | 32               |
| Co <sub>0.62</sub> Zn <sub>0.38</sub> Se@N CF-800 | Electrospinning & pyrolysis                | 0.1M KOH                           | 5.05                                      | 0.83 Vs RHE                | 33               |



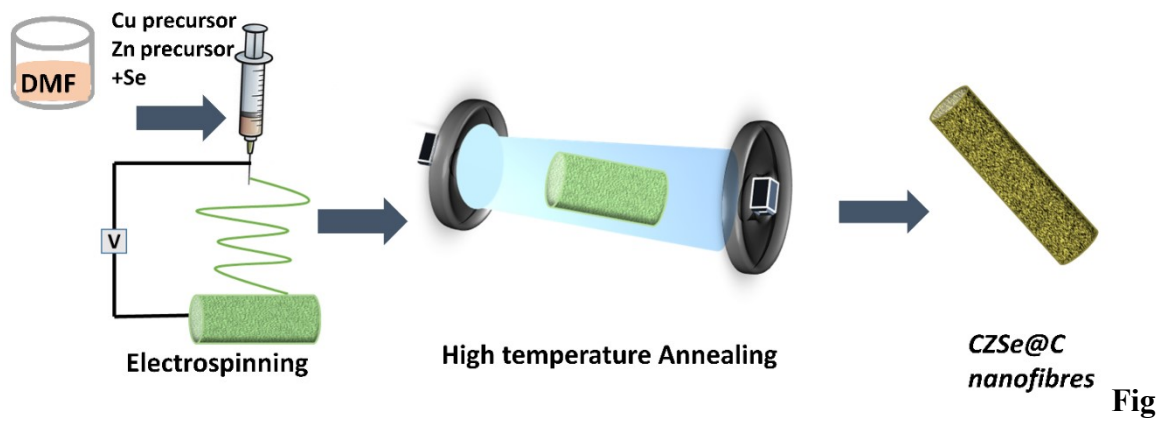

. S1 Schematic representation of electrode fabrication via electrospinning.

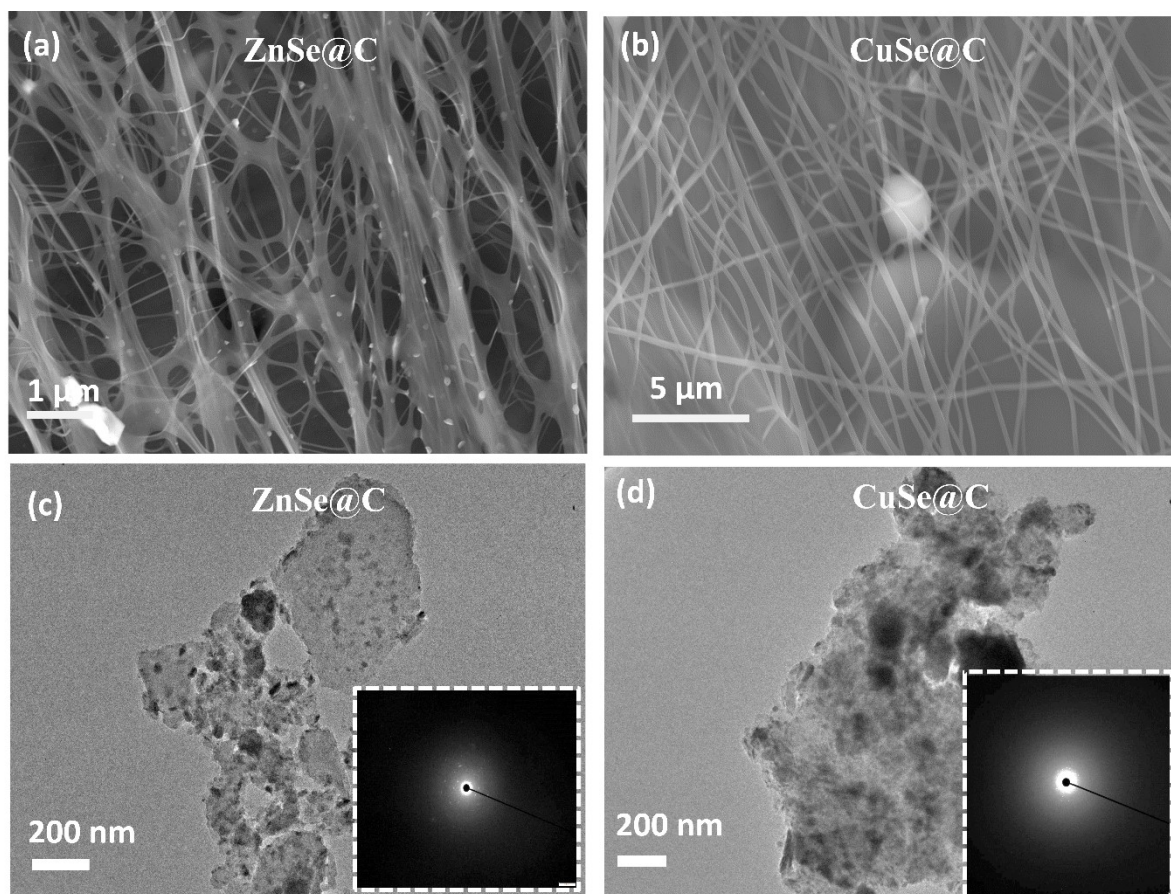

**Fig. S2** SEM images: (a) ZnSe@C. (b) CuSe@C. TEM images of: (c) ZnSe@C at low resolution with an inset of SAED. (d) CuSe@C at low resolution with an inset of SAED.

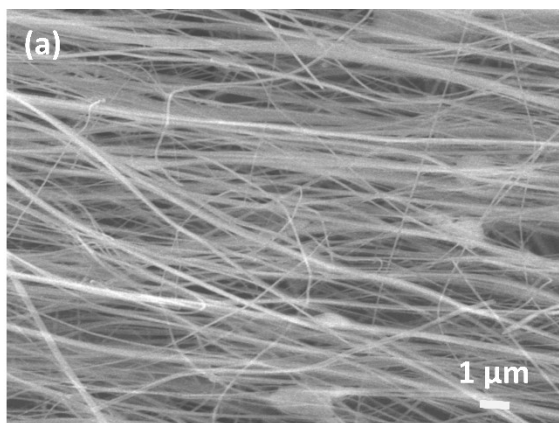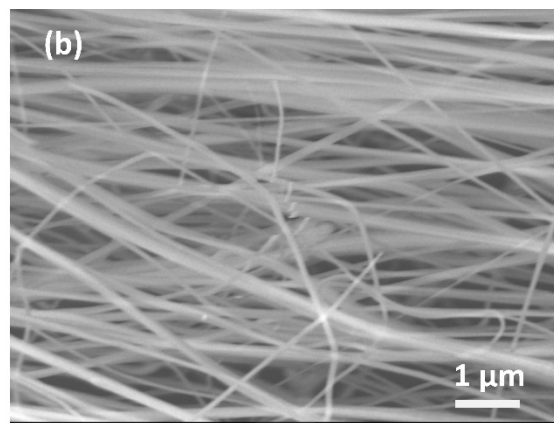

**Fig. S3** SEM images: (a) & (b) CZSe@C nanofibers before annealing.

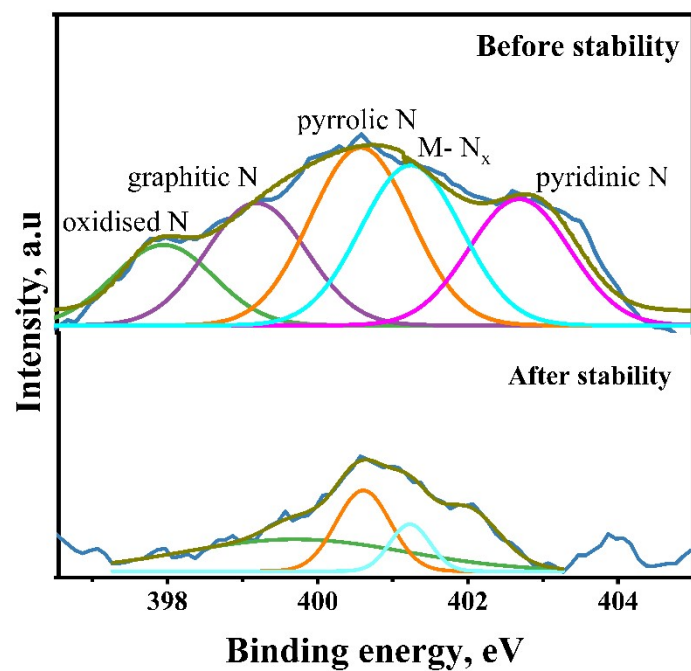

**Fig. S4** XPS N 1s spectra of CZSe@C-450 (before and after stability).

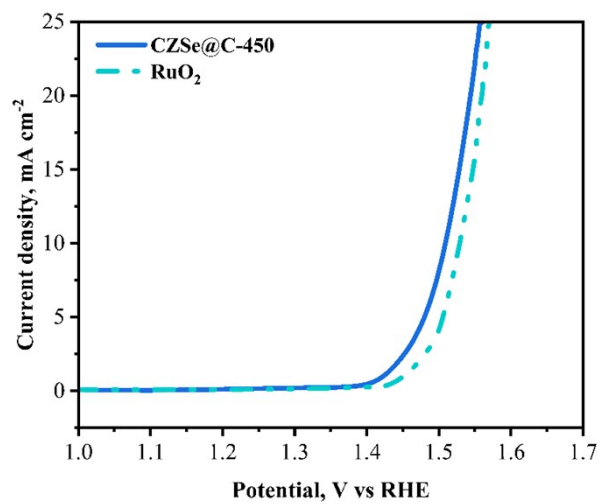

**Fig. S5** LSV curve of CZSe@C-450 and RuO<sub>2</sub>.

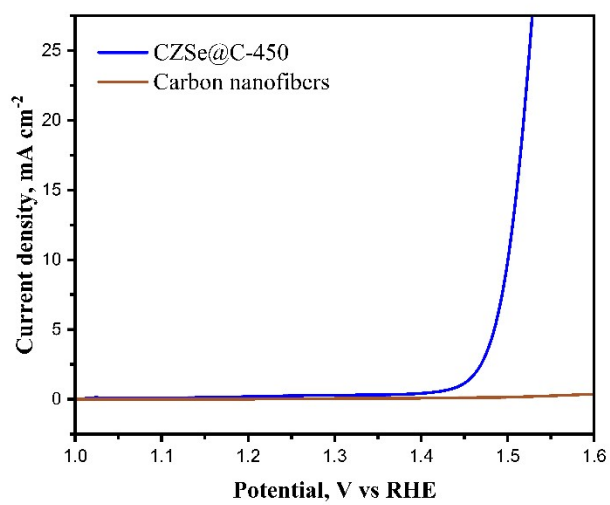

**Fig. S6** LSV (OER) of CZSe@C-450 and carbon nanofibers.

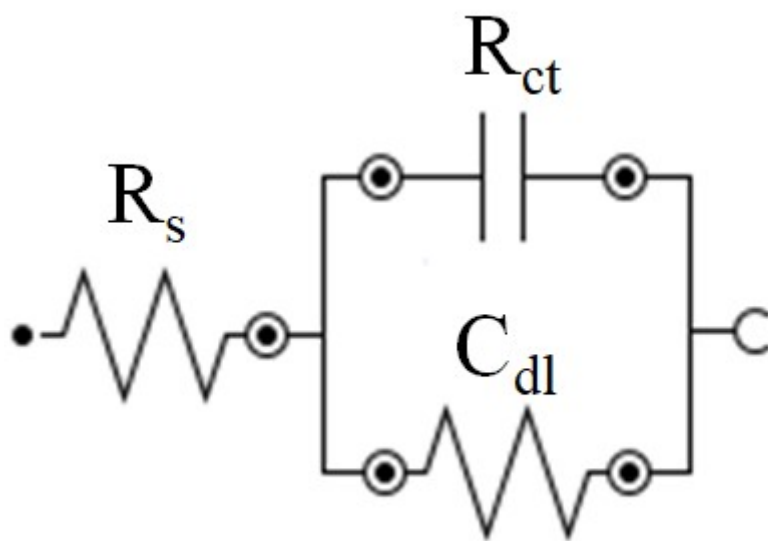

**Fig. S7** Equivalent circuit fit of EIS data.

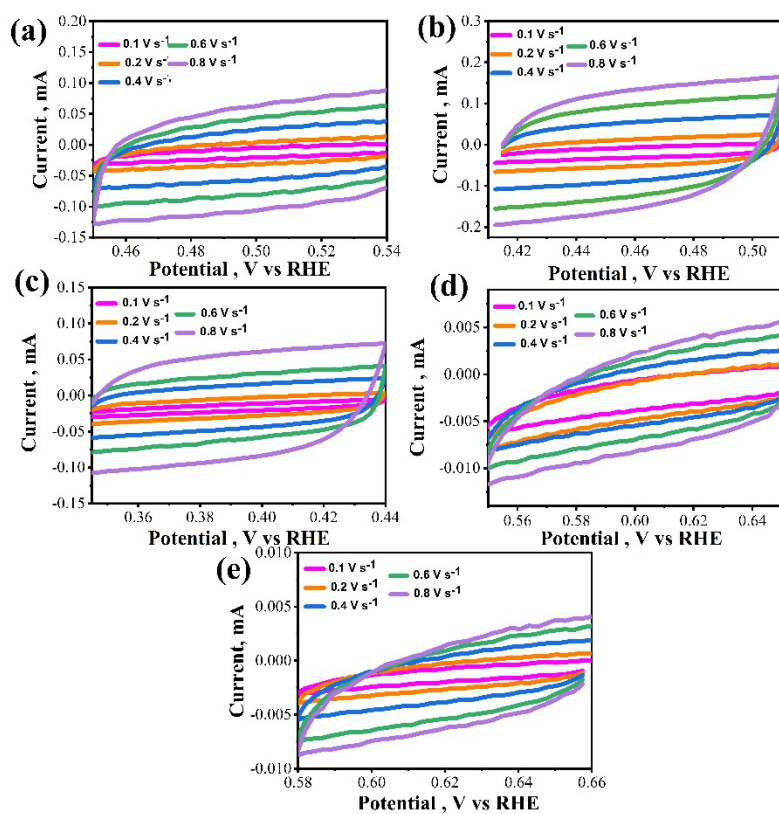

**Fig. S8** Cyclic voltammetry curves (non-faradaic region) at various scan rates: (a) CZSe@C-350. (b) CZSe@C-450. (c) CZSe@C-550. (d) CuSe@C. (e) ZnSe@C.

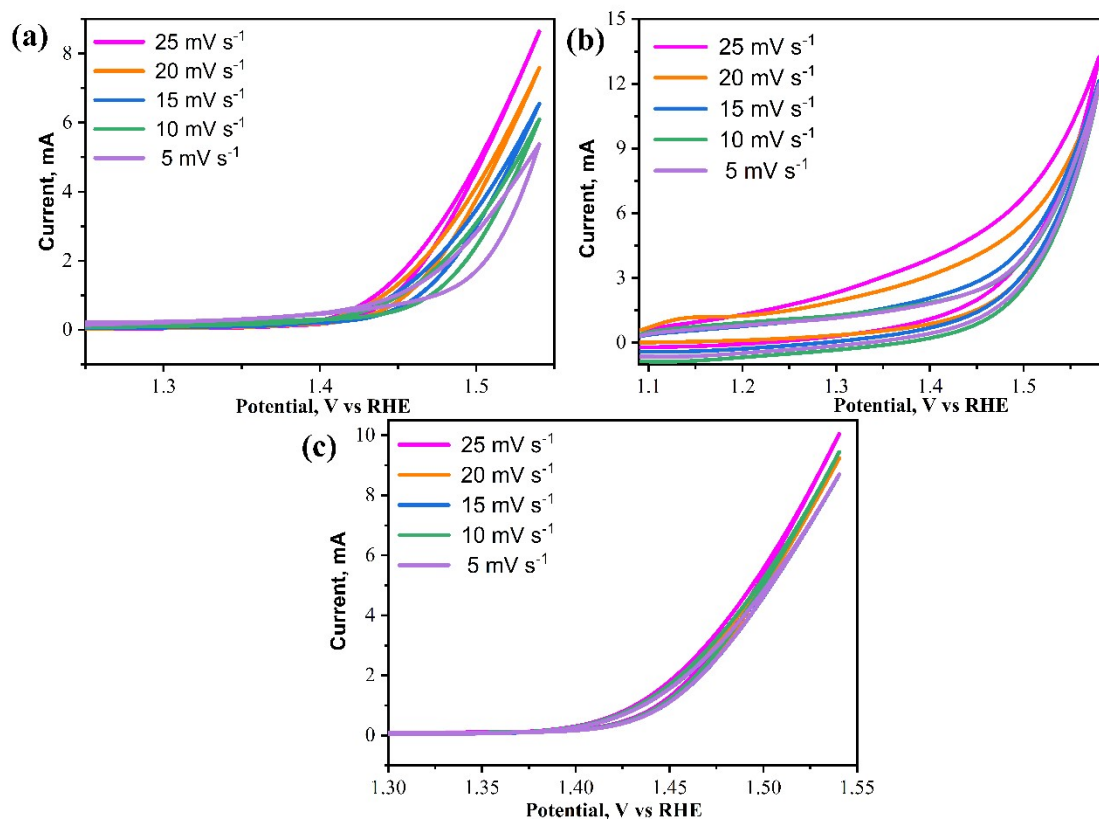

**Fig. S9** Cyclic voltammetry curves at various scan rates: (a) CZSe@C-350. (b) CZSe@C-450. (c) CZSe@C-550.



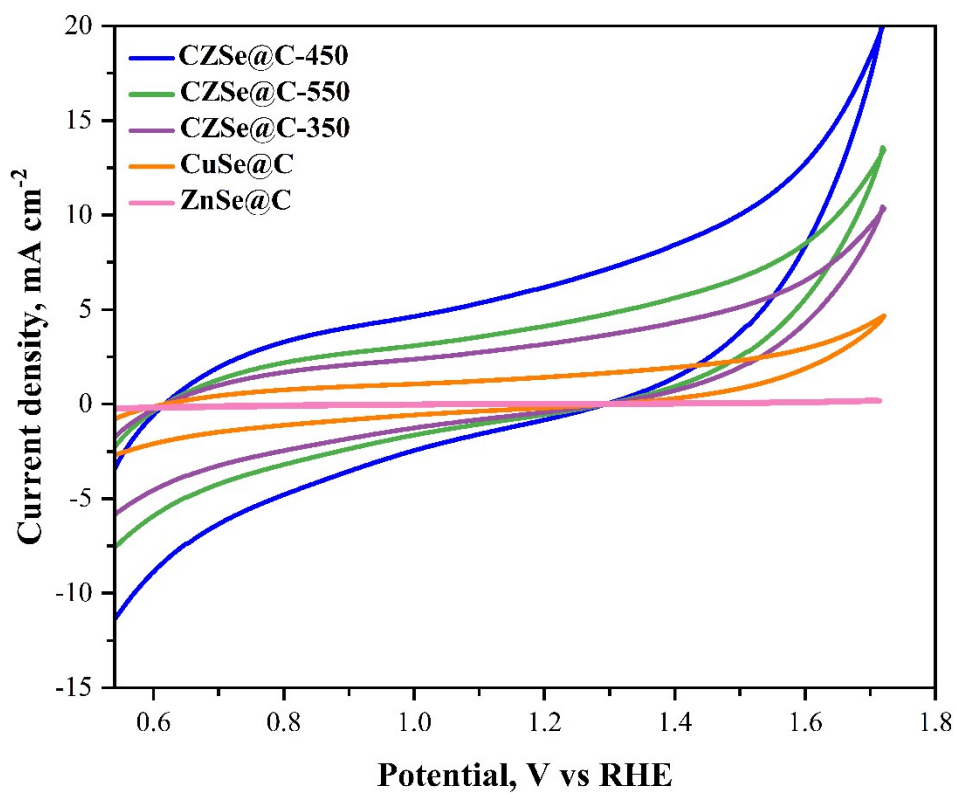

**Fig. S10** Cyclic voltammetry curves of CuSe@C, ZnSe@C, CZSe@C-350, CZSe@C-450, and CZSe@C-550.

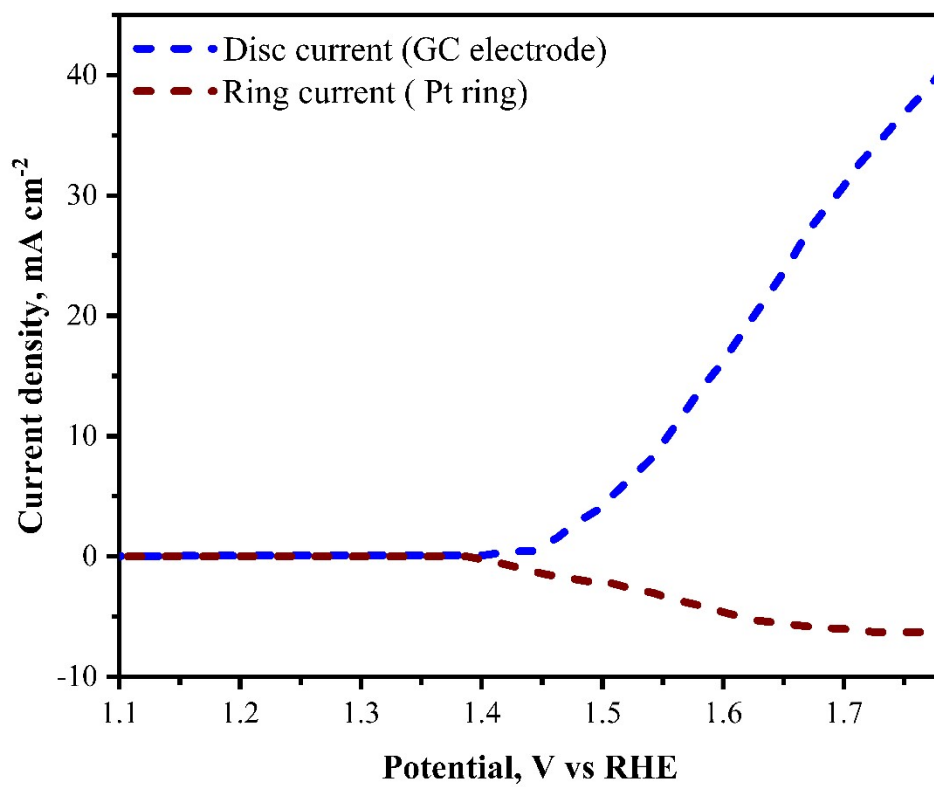

**Fig. S11** Ring current and disc current of RRDE linear sweep voltammetry for CZSe@C-450.

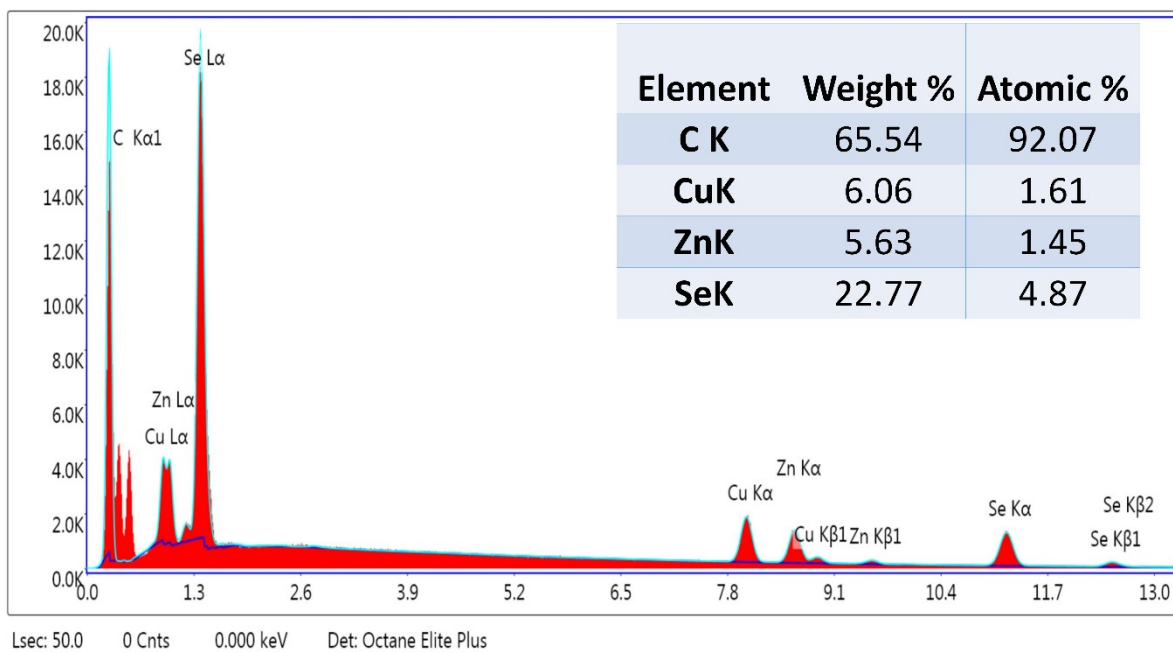

**Fig. S12** EDX analysis of CZSe@C-450 before testing.

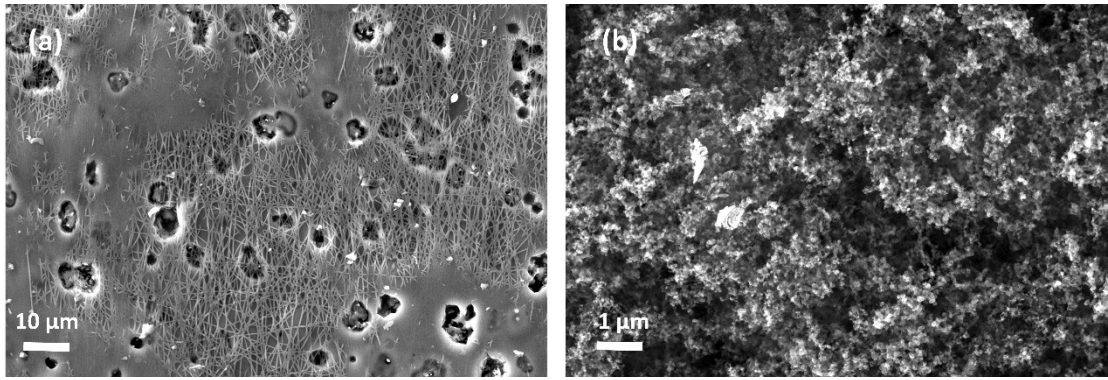

**Fig. S13** SEM analysis of CZSe@C-450 after stability testing for: a) 12 hours. b) 50 hours.

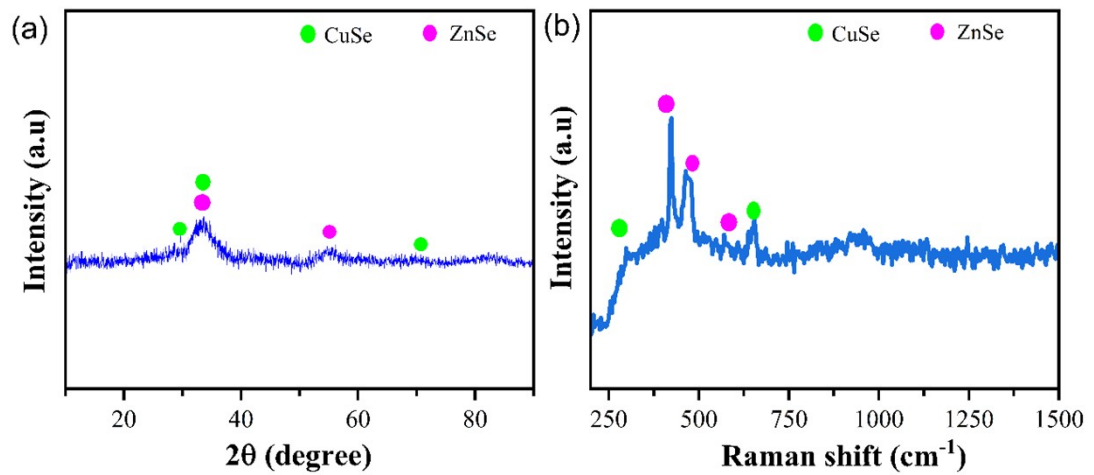

**Fig. S14** Post 50-hour stability analysis of CZSe@C-450 using: a) XRD. b) Raman.

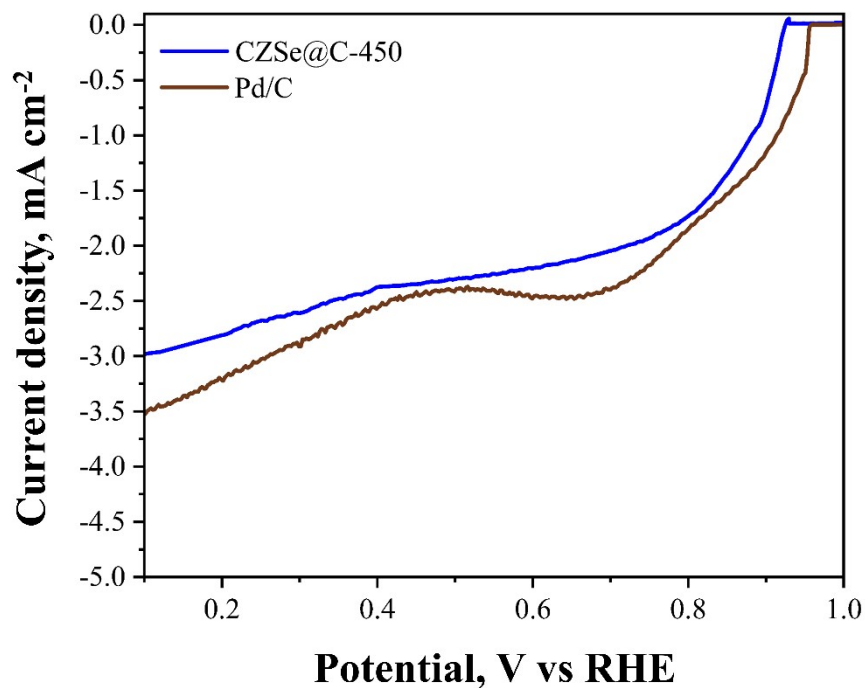

Fig. S15 ORR polarisation curve of CZSe@C-450 and Pd/C at 1500 rpm.

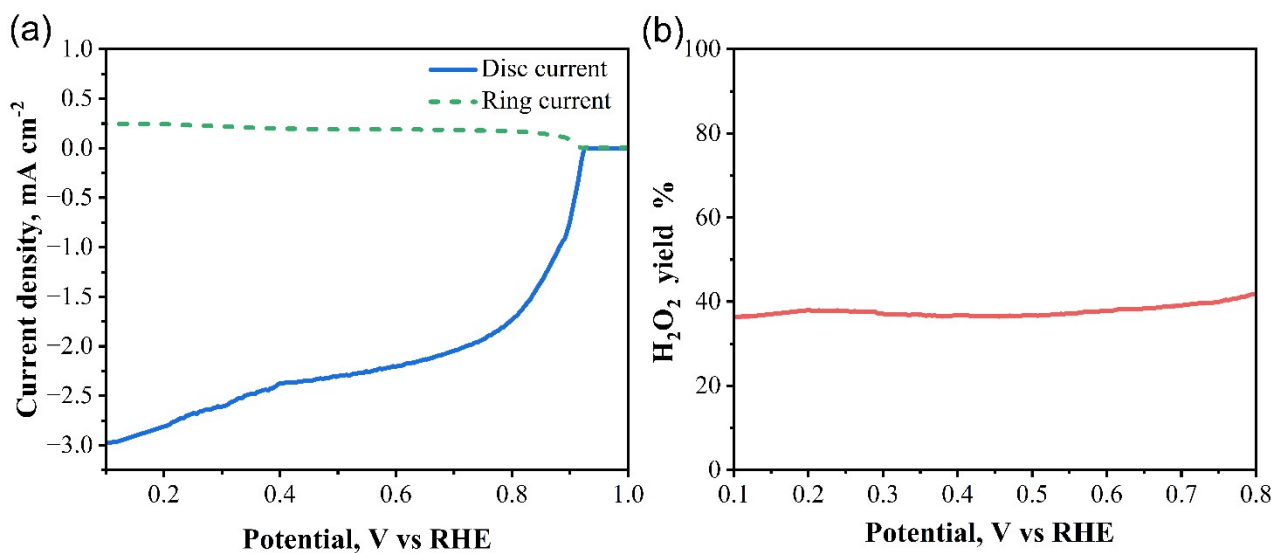

Fig. S16 Rotating ring–disk electrode (RRDE) analysis during ORR of CZSe@C-450

: a) determination of electron transfer number. b)  $\text{H}_2\text{O}_2$  yield with potential.

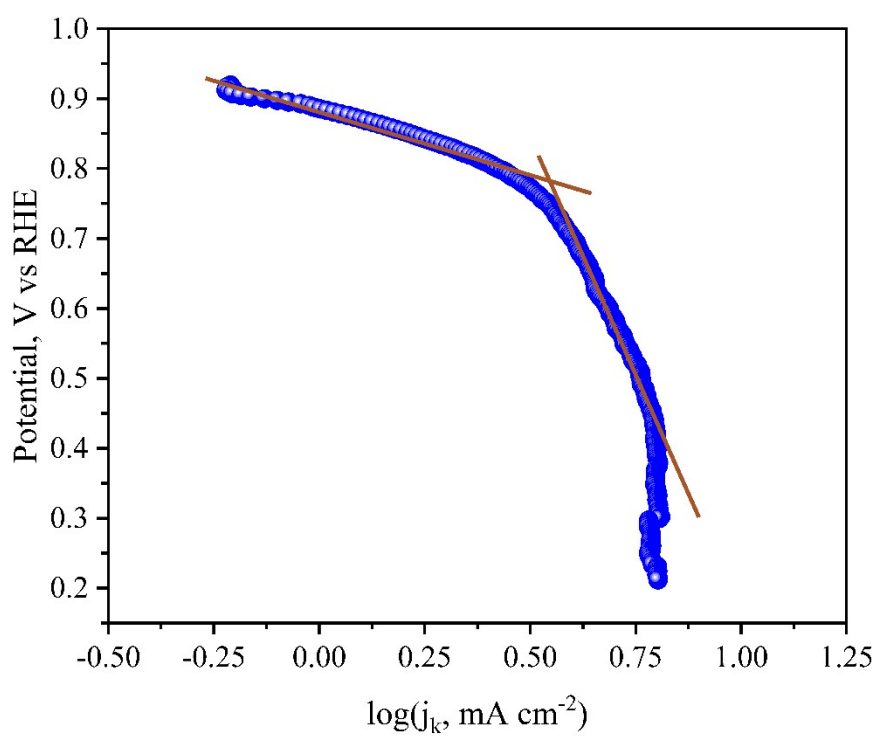

**Fig. S17** Mass transfer correlated Tafel plot for ORR of CZSe@C-450.

**Table S6** Tafel slope and exchange current density values for ORR of CZSe@C-450.

| Region           | Tafel slope, mV dec <sup>-1</sup> | Exchange current density, mA cm <sup>-2</sup> |
|------------------|-----------------------------------|-----------------------------------------------|
| Higher potential | 263                               | 0.83                                          |
| Lower potential  | 2878                              | 2.63                                          |

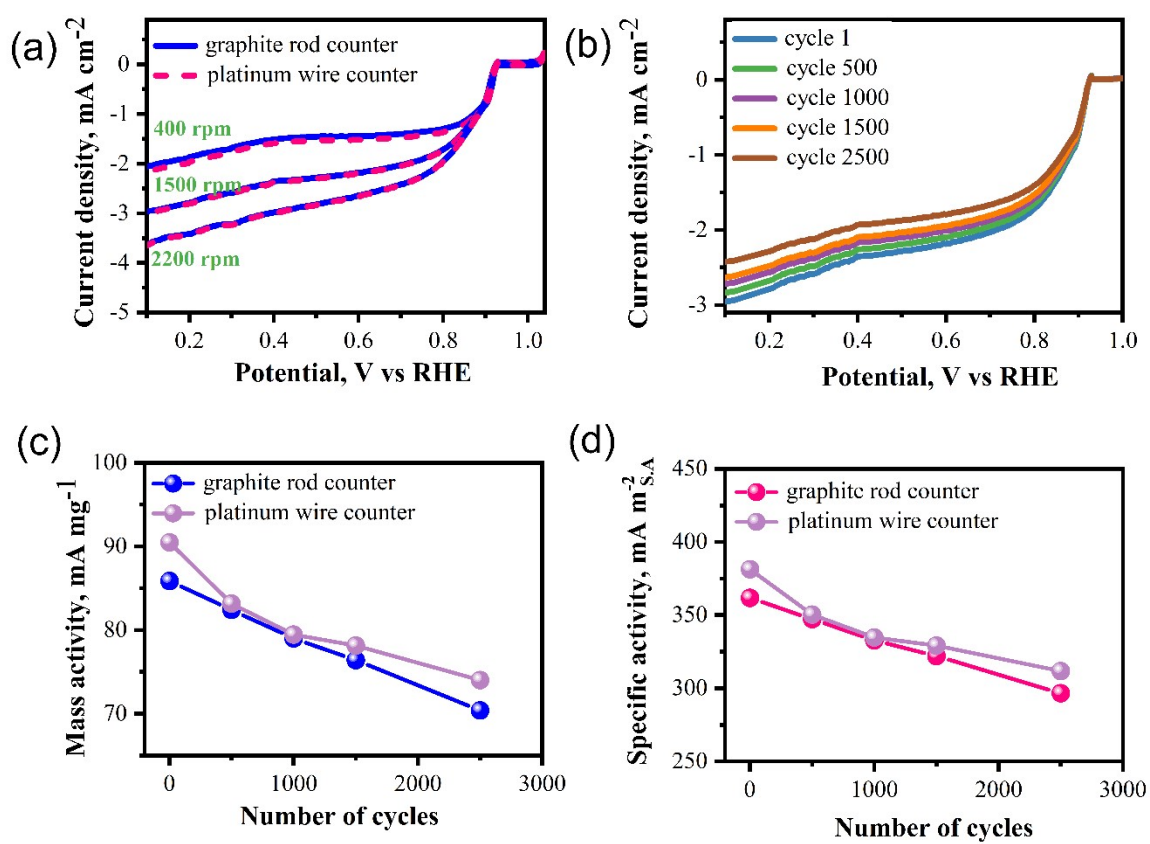

**Fig. S18** CZSe@C-450 ORR polarization using graphite rod as counter electrode: a) LSV at different rotating speeds., b) LSV (cycling). c) Mass activity. d) Specific activity.

## References:

1. McCrory, C; C. L; Jung, S; Peters, J. C; Jaramillo, T. F. (2013). Benchmarking Heterogeneous Electrocatalysts for the Oxygen Evolution Reaction. *Journal of the American Chemical Society*, 135(45), 16977–16987. DOI:10.1021/ja407115p
2. Han, H; Choi, H; Mhin, S; Hong, Y.-R; Kim, K. M; Kwon, J; Ali, G; Chung, K; Je, M; Umh,H; Lim, D; Davey, K; Qiao,S; Paik, U; T, Sang. (2019). Advantageous Crystalline-Amorphous Phase Boundary for Enhanced Electrochemical Water Oxidation. *Energy & Environmental Science*, 12, 2443–2454. DOI:10.1039/c9ee00950g.
3. Anantharaj, S; Ede, S. R; Karthick, K; Sam Sankar, S; Sangeetha, K; Karthik, P. E; & Kundu, S. (2018). Precision and correctness in the evaluation of electrocatalytic water splitting: revisiting activity parameters with a critical assessment. *Energy & Environmental Science*, 11(4), 744–771. DOI:10.1039/c7ee03457a.
4. Vaughn II, D. D., Araujo, J., Meduri, P., Callejas, J. F., Hickner, M. A., & Schaak, R. E. (2014). Solution Synthesis of Cu<sub>3</sub>PdN Nanocrystals as Ternary Metal Nitride Electrocatalysts for the Oxygen Reduction Reaction. *Chemistry of Materials*, 26(21), 6226–6232. DOI:10.1021/cm5029723.
5. Masud, Jahangir; Liyanage, Wipula P. R.; Cao, Xi; Saxena, Apurv; Nath, Manashi. (2018). Copper Selenides as High-efficiency Electrocatalysts for Oxygen Evolution Reaction. *ACS Applied Energy Materials*, 1, 4075–4083. DOI:10.1021/acsaem.8b00746.
6. Chakraborty, Biswarup; BeltrÃ¡n-Suito, Rodrigo; Hlukhyy, Viktor; Schmidt, Johannes; Menezes, Prashanth, W; Driess, Matthias. (2020). Crystalline Copper Selenide as a Reliable Non-Noble Electro(pre)catalyst for Overall Water-Splitting. *ChemSusChem*, 13(12), 3222–3229. DOI:10.1002/cssc.202000445.
7. Hou, Chun-Chao; Fu, Wen-Fu; Chen, Yong. (2016). Self-Supported Cu-Based Nanowire Arrays as Noble-Metal-Free Electrocatalysts for Oxygen Evolution. *ChemSusChem*. 9(16), 2069–2073. DOI:10.1002/cssc.201600592.
8. Liu, Xiang; Cui, Shengsheng; Sun, Zijun; Ren, Yang; Zhang, Xiaoyi; Du, Pingwu. (2016). Self-Supported Copper Oxide Electrocatalyst for Water Oxidation at Low Overpotential and Confirmation of Its Robustness by Cu K-Edge X-ray Absorption Spectroscopy. *The Journal of Physical Chemistry C*. 120, 831–840. DOI: 10.1021/acs.jpcc.5b09818.
9. Handoko, Albertus D; Deng, Suzi; Deng, Yilin; Cheng, Andy Wing Fai; Chan, Kuang Wen; Pan, Yanlin; Tan, Hui Ru; TOK, Eng Soon; Sow, C. H; Yeo, Boon Siang. (2015). Enhanced Activity of H<sub>2</sub>O<sub>2</sub> treated Mesostructured Copper (II) Oxide Nanostructures during the Electrochemical Evolution of Oxygen. *Catalysis Science & Technology*, 6, 269–274. DOI:10.1039/C5CY00861A.
10. Sun, Wei; Song, Ya; Gong, Xue-Qing; Cao, Li-mei; Yang, Ji. (2015). An efficiently tuned d-orbital occupation of IrO<sub>2</sub> by doping with Cu for enhancing the oxygen evolution reaction activity. *Chemical science*, 6(8), 4993–4999. DOI:10.1039/c5sc01251a.



11. Serov, A.; Andersen, N. I.; Roy, A. J.; Matanovic, I.; Artyushkova, K.; Atanassov, P. (2015). CuCo<sub>2</sub>O<sub>4</sub> ORR/OER Bi-Functional Catalyst: Influence of Synthetic Approach on Performance. *Journal of the Electrochemical Society*, 162(4), F449–F454.  
DOI: 10.1149/2.0921504jes.
12. Hinogami, R.; Toyoda, K.; Aizawa, M.; Kawasaki, T.; Gyoten, H. (2013). Copper Delafossite Anode for Water Electrolysis. *ECS Transactions*, 58(2), 27–31.  
DOI: 10.1149/05802.0027ecst.
13. Hou, Chun-Chao; Chen, Qian-Qian; Wang, Chuan-Jun; Liang, Fei; Lin, Zheshuai; Fu, Wen-Fu; Chen, Yong. (2016). Self-Supported Cedarlike Semimetallic Cu<sub>3</sub>P/CuO Nanoarrays as a 3D High-Performance Janus Electrode for Both Oxygen and Hydrogen Evolution under Basic Conditions. *ACS Applied Materials & Interfaces*, 8, 23037–23048.  
DOI:10.1021/acsami.6b0625.
14. Du, Jian; Li, Fei; Wang, Yong; Zhu, Yong; Sun, Licheng. (2018). Cu<sub>3</sub>P/CuO Core-Shell Nanorod Arrays as High-Performance Electrocatalysts for Water Oxidation. *ChemElectroChem*, 5, 2064–2068.  
DOI:10.1002/celec.201800323.
15. He, Liangbo; Zhou, Dan; Lin, Yao; Ge, Ruixiang; Hou, Xiandeng; Sun, Xuping; Zheng, Chengbin. (2018). Ultra-Rapid in Situ Synthesis of Cu<sub>2</sub>S Nanosheet Arrays on Copper Foam with Room Temperature Active Iodine Plasma for Efficient and Cost-Effective Oxygen Evolution. *ACS Catalysis*, 8, 3859–3864.  
DOI:10.1021/acscatal.8b00032.
16. Huan, Tran Ngoc; Rouse, Gwenaëlle; Zanna, Sandrine; Lucas, Ivan T.; Xu, Xiangzhen; Menguy, Nicolas; Mougel, Victor; Fontecave, Marc. (2017). A Dendritic Nanostructured Copper Oxide Electrocatalyst for the Oxygen Evolution Reaction. *Angewandte Chemie International Edition*, 56(17), 4792–4796.  
DOI:10.1002/anie.201700388.
17. Chauhan, Meenakshi; Reddy, Kasala Prabhakar; Gopinath, Chinnakonda S.; Deka, Sasanka. (2017). Copper Cobalt Sulphide Nanosheets Realizing Promising Electrocatalytic Oxygen Evolution Reaction. *ACS Catalysis*, 7, 5871–5879.  
DOI:10.1021/acscatal.7b0183.
18. Du, Jialei; Chen, Zuofeng; Ye, Shengrong; Wiley, Benjamin J.; Meyer, Thomas J. (2015). Copper as a Robust and Transparent Electrocatalyst for Water Oxidation. *Angewandte Chemie International Edition*, 54(7), 2073–2078.  
DOI:10.1002/anie.201408854.
19. Cheng, Ningyan; Xue, Yurui; Liu, Qian; Tian, Jingqi; Zhang, Lixue; Asiri, Abdullah M.; Sun, Xuping. (2015). Cu/(Cu(OH)<sub>2</sub>-CuO) core/shell nanorods array: in-situ growth and application as an efficient 3D oxygen evolution anode. *Electrochimica Acta*, 163, 102–106.  
DOI: 10.1016/j.electacta.2015.02.099.
20. Shi, Wenhui, and Jianshe Lian. (2019). Facile Synthesis of Copper Selenide with Fluffy Intersected-Nanosheets Decorating Nanotubes Structure for Efficient Oxygen Evolution Reaction. *International Journal of Hydrogen Energy*, 44(41), 22983–90.  
DOI: 10.1016/j.ijhydene.2019.07.008.
21. Chen, Hu; Gao, Yan; Ye, Lu; Yao, Yanan; Chen, Xuyang; Wei, Yu; Sun, Licheng. (2018). A Cu<sub>2</sub>Se-Cu<sub>2</sub>O Film Electrodeposited on Titanium Foil as a Highly Active and

- Stable Electrocatalyst for the Oxygen Evolution Reaction. *Chemical Communications*, 54 (39), 4979–4982.  
DOI:10.1039/C8CC02021C.
22. Deng, Shengjue; Shen, Yanbin; Xie, Dong; Lu, Yangfan; Yu, Xiaolong; Yang, Liang; Wang, Xiuli; Xia, Xinhui; Tu, Jiangping. (2019). Directional construction of Cu<sub>2</sub>S branch arrays for advanced oxygen evolution reaction. *Journal of Energy Chemistry*, 39, 61–67.  
DOI: 10.1016/j.jechem.2019.01.014.
23. Chen, Zhu; Kronawitter, Coleman; Yang, Xiaofang; Yeh, Yao-Wen; Yao, N; Koel, Bruce E. (2017). Promoting Effect of Tetravalent Cerium on the Oxygen Evolution Activity of Copper Oxide Catalysts. *Physical Chemistry Chemical Physics*, 19, 31545–31552.  
DOI:10.1039/C7CP05248K.
24. Yu, Jun; Cao, Qi; Feng, Bin; Li, Changli; Liu, Jingyuan; Clark, J. Kenji; Delaunay, Jean-Jacques. (2018). Insights into the efficiency and stability of Cu-based nanowires for electrocatalytic oxygen evolution. *Nano Research*, 11(8), 4323–4332.  
DOI:10.1007/s12274-018-2020-1.
25. Cao, Xi; E. Medvedeva, Julia; Nath, Manashi. (2020). Copper Cobalt Selenide as a High-Efficiency Bifunctional Electrocatalyst for Overall Water Splitting: Combined Experimental and Theoretical Study. *ACS Applied Energy Materials*, 3, 3092–3103.  
DOI:10.1021/acsaem.0c00262
26. Chae, Su-Hyeong; Muthurasu, Alagan; Kim, Taewoo; Kim, Jin Soo; Khil, Myung-Seob; Lee, Minju; Kim, Hyoju; Lee, Jun Youb; Kim, Hak Yong. (2021). Templated Fabrication of Perfectly Aligned Metal-Organic Framework-Supported Iron-Doped Copper-Cobalt Selenide Nanostructure on Hollow Carbon Nanofibers for an Efficient Trifunctional Electrode Material. *Applied Catalysis B: Environmental*, 293, 120209.  
DOI: 10.1016/j.apcatb.2021.120209.
27. Bose, Ranjith; Karuppasamy, K.; Arunkumar, Paulraj; Kumar, Veerasubramani Ganesh; Gayathri, Sampath; Santhoshkumar, P.; Vikraman, Dhanasekaran; Han, Jong Hun; Kim, Hyun-Seok; Alfantazi, Akram. (2021). Self-Supportive Bimetallic Selenide Heteronanostructures as High-Efficiency Electro(Pre)Catalysts for Water Oxidation. *ACS Sustainable Chemistry & Engineering*, 9(38) 13114–23.  
DOI:10.1021/acssuschemeng.1c05728.
28. Sadaf, Jamil; Jabeen, Naila; Khan, Latif U.; Bashir, Amna; Janjua, Naveed; Harfouche, Messaoud; Sohail, Manzar. (2021). Synthesis and Comparative Evaluation of Optical and Electrochemical Properties of Efficacious Heterostructured-Nanocatalysts of ZnSe with Commercial and Reduced Titania. *Journal of Alloys and Compounds*, 879, 160449. DOI: 10.1016/j.jallcom.2021.160449.
29. Yang, Jianping; Chen, Xinqi; Dai, Wei; Wu, Tian; Li, Jie; Luo, Wei; Xu, Kaibing; Xu, Hui; Qin, Feng. (2018). Low-dimensional copper selenide nanostructures: controllable synthesis approach and morphology-dependent electrocatalytic performance. *ChemElectroChem*, 6 (2), 574–580.  
DOI:10.1002/celec.201801130.
30. Tan, Liang; Liu, Zhao-Qing; Li, Nan; Zhang, Jia-Yi; Zhang, Lei; Chen, Shuang. (2016). CuSe decorated carbon nanotubes as a high performance cathode catalyst for

- microbial fuel cells. *Electrochimica Acta*, 213, 283–290. DOI: 10.1016/j.electacta.2016.07.099.
31. Tan, L; Li, N; Chen, S; & Liu, Z.-Q. (2016). Self-assembly synthesis of CuSe@graphene–carbon nanotubes as efficient and robust oxygen reduction electrocatalysts for microbial fuel cells. *Journal of Materials Chemistry A*, 4(31), 12273–12280. DOI:10.1039/c6ta02891h.
  32. Chen, Ping; Xiao, Tian-Yuan; Li, Hui-Hui; Yang, Jing-Jing; Wang, Zheng; Yao, Hong-Bin; Yu, Shu-Hong. (2012). Nitrogen-Doped Graphene/ZnSe Nanocomposites: Hydrothermal Synthesis and Their Enhanced Electrochemical and Photocatalytic Activities. *ACS Nano*, 6(1), 712–719. DOI:10.1021/nn204191x.
  33. Lv, Li-Ping; Du, Pingping; Liu, Pengbo; Li, Xiaopeng; Wang, Yong. (2020). Integrating Mixed Metallic Selenides/Nitrogen-Doped Carbon Heterostructures in One-Dimensional Carbon Fibers for Efficient Oxygen Reduction Electrocatalysis. *ACS Sustainable Chemistry & Engineering*, 8(22), 8391–8401. DOI:10.1021/acssuschemeng.0c02572.
